# Supplementary material
Source: publisher site journal article supplement (https://www.dovepress.com/article/593633)
Supplement: Supplementary file 1 [file 593633_Appendix%201-3.docx]

**Appendix 1: Patient cases**

**Patient case for day 1:**

Patient case 1 is a 22-year old (71 kg) female student at University. She is being seen today at King Khalid University Hospital Outpatient Clinic for an initial work-up after experiencing a single convulsion two days ago. The seizure occurred about one-half hour after awakening. Patient reported that she had been studying for an exam until 3 A.M., after which she experienced a brief sensation of **right-arm tingling and déjà vu** just before losing consciousness. Upon regaining consciousness, she was extremely tired, her legs and arms were sore, her tongue was bleeding, and she had urinated.

Her sister witnessed the event and reported that during the seizure, Patient case 1 ’s eyes rolled to the back of her head, she fell to the floor, and her body stiffened. She then thrashed uncontrollably on the floor for 1-2 minutes. The patient’s laboratory findings are presented in Appendix Table 1

**HPI:** Patient denies any prior seizures

**PMH:** None

**Family History:** Father had “grand mal” seizures as a teenager

**PE/Neuro exam:** Normal

**Medications:** Desogestrel – 1 tablet PO daily

**Diagnostic tests:**

- **EEG:** Normal
- **Brain MRI:** Normal

**Appendix Table 1**. Laboratory findings of the patient

| **Test Category** | **Parameter** | **Result** |
| --- | --- | --- |
| Complete Blood Count (CBC) | Hemoglobin (Hb) | 14.2 g/dL |
|  | White Blood Cells (WBC) | 7,500/mm³ |
|  | Platelets | 250,000/mm³ |
| Electrolyte Panel (BMP) | Na | 138 mmol/L |
|  | K | 4.1 mmol/L |
|  | Ca | 9.1 mg/dL |
|  | Mg | 1.9 mg/dL |
|  | Fasting BG | 88 mg/dL |
| Liver Function Tests (LFTs) | ALT | 21 U/L |
|  | AST | 19 U/L |
|  | Total Bilirubin | 0.7 mg/dL |
| Renal Function Tests | Blood Urea Nitrogen (BUN) | 14 mg/dL |
|  | Creatinine | 0.9 mg/dL |
| Toxicology | Toxicology Screen | Negative |
|  | Urine Drug Screen | Negative |

**📌 Physician’s Statement:**

"After evaluating the patient’s history, symptoms, and diagnostic findings, Patient case 1. is found to have ***focal epilepsy with secondary generalization (focal to bilateral tonic-clonic seizure)***".

**Questions to be answered by the Interprofessional team**

- 1. **What vitals would you assess during this visit? (1 point)**
  2. **Recommend an appropriate antiepileptic drug regimen (include dosing recommendations) for Patient case 1 ’s epilepsy. Provide a rationale for your choice. (3 point)**
  3. **What monitoring labs and/or drug levels would you request for this patient? (2 point)**
  4. **Are there any necessary adjustments required to this patient’s current treatments? (1 point)**
  5. **What nondrug measures may be useful in managing Patient case 1.’s epilepsy ? (1 point)**
  6. **What education should be provided to Patient case 1 and her family? (1 point)**
  7. **Patient case 1 is a university student with a demanding academic schedule. She is concerned about how her epilepsy diagnosis and the need for long-term medication might disrupt her studies and daily life. As an interprofessional team (physician, pharmacist, nurse, and psychologist), how would you tailor her treatment plan to minimize disruptions to her academic life while ensuring effective seizure control? (1 point)**

**Patient case for day 2:**

Patient case 2 is a 25-year-old (76 kg) male patient who recently moved from Abha to Riyadh 6 months ago. He presents at King Khalid University Hospital Outpatient Clinic for an **evaluation of seizure episode** that occurred **three days ago**. During the episode, his wife reported that he suddenly stopped his activity, stared blankly for about 2 minutes, and exhibited involuntary repetitive chewing movements. Following the event, he was confused, extremely fatigued, and appeared frightened. The patient’s laboratory findings are presented in Appendix Table 2

**HPI:** Patient denies any prior seizures. However, Patient case 2 has been experiencing **increased stress levels** over the past few months. Since relocating to Riyadh, he has faced **significant work pressure** due to long hours at a new job, leading to **irregular sleep patterns**and**frequent late nights until 2–3 AM.**

**PMH:** **Ischemic stroke at age 23** secondary to **protein C deficiency**

**Family History:** No family history of epilepsy

**PE/Neuro exam:** No deficits

**Medications:**

- - - Warfarin – 5 mg PO once daily
    - Atorvastatin – 20 mg PO once daily

**Diagnostic tests:**

- **EEG:** Normal
- **Brain MRI:** Old left MCA (middle cerebral artery) infarct

**Appendix Table 2.** Laboratory findings of the patient

| **Test Category** | **Parameter** | **Result** |
| --- | --- | --- |
| Complete Blood Count (CBC) | Hemoglobin (Hb) | 9.8 g/dL |
|  | White Blood Cells (WBC) | 7,500/mm³ |
|  | Platelets | 250,000/mm³ |
| Electrolyte Panel (BMP) | Na | 138 mmol/L |
|  | K | 4.1 mmol/L |
|  | Ca | 9.1 mg/dL |
|  | Mg | 1.9 mg/dL |
|  | Fasting BG | 88 mg/dL |
| Liver Function Tests (LFTs) | ALT | 21 U/L |
|  | AST | 19 U/L |
|  | Total Bilirubin | 0.7 mg/dL |
| Renal Function Tests | Blood Urea Nitrogen (BUN) | 14 mg/dL |
|  | Creatinine | 0.9 mg/dL |
| Coagulation Profile | INR | 2.1 |

**📌 Physician’s Statement:**

"After evaluating the patient’s history, symptoms, and diagnostic findings, Patient case 2 is found to have***focal impaired awareness seizure (complex partial seizure)*".**

**Questions to be answered by the Interprofessional team**

1. **What vitals would you assess during this visit? (1 point)**
2. **Recommend an appropriate antiepileptic drug regimen (include dosing recommendations) for Patient case 2’s epilepsy. Provide a rationale for your choice. (3 point)**
3. **What monitoring labs and/or drug levels would you request for this patient? (2 point)**
4. **Are there any necessary adjustments required to this patient’s current treatments? (1 point)**
5. **What nondrug measures may be useful in managing Patient case 2’s epilepsy ? (1 point)**
6. **What education should be provided to Patient case 2 and his family? (1 point)**
7. **Patient case 2 comes from a culture where epilepsy is often stigmatized, and he is hesitant to disclose his condition to his peers. How would you, as an interprofessional team, address his concerns while ensuring his safety and well-being? (1 point)**

**Appendix 2: IPE Educational presentation**

**Objectives**

1. Define interprofessional education (IPE)
2. Discuss core competencies of interprofessional education
3. Identify the importance of interprofessional collaboration & its impact on quality and safety of patient care
4. Discuss the importance of communication for effective collaboration
5. Identify the opportunities for using IPE to improve interprofessional collaboration

**Definition of Interprofessional Education (IPE)**

Learners from two or more professions learn about, from, and with each other to enable effective collaboration and improve Quality of Care

“It is no longer enough for health workers to be professional. In the current global climate, health workers also need to be interprofessional.”

~ WHO, 2010

**Why IPE is important?**

- Interprofessional education has been identified as a strategy towards improving interprofessional working and collaboration.
- Effective interprofessional education between health care sectors is believed to improve the:
- Quality of care
- Patient safety
- Integrated care
- Especially with the increasing complexity of the health system
- Increased number of approved medications/extended indications.
- Guideline clearinghouse list 2700 guidelines.
- Each year results from ~ 2500 clinical trials get published.
- Increasing comorbidities among population
- Increased burden of chronic diseases.

**IPE competencies**

- Integrated enactment of knowledge, skills, and values/attitudes that define working together across the professions, with other healthcare workers, patients, families, and communities as appropriate to improve health outcomes in specific care contexts.

Interprofessional Education Competencies Domains

Competency Domain: Values/Ethics for Interprofessional Practice: Work with individuals of other professions to maintain a climate of mutual respect and shared values, confidentiality, privacy, trust, and cooperation.

Competency Domain: Roles/Responsibilities: Use the knowledge of one’s own role and those of other professions to appropriately assess and address the health care needs of the patients and populations served.

Competency Domain: Interprofessional Communication: Communicate with patients, families, communities, and other health professionals in a responsive and responsible manner.

Competency Domain: teams and teamwork: Apply values and principles of the science of teamwork to adapt one’s own role in a variety of team settings.

**Importance of Interprofessional communication**

In 2006, the Joint Commission on Accreditation of Health Care Organization reported that: 70% of medical errors were caused by lack of communication between team members.

- Challenges/Barriers
  - - Language barrier
    - Distractions
    - Physical proximity
    - Personalities
    - Workload
    - Varying communication styles
    - Conflict
    - Lack of information verification
    - Shift change

**Example of IPE Activities**

- Experiential training programs
  - Clinical Sessions during internship
  - Interprofessional clinical rounds (e.g. Tumor board, M&M meetings)
  - Interprofessional ambulatory clinics: Students team up and assigned a real patient from outpatient clinic
  - Case presentations
  - Case studies
  - Journal clubs
  - Ethic cases Community-based related activities
  - Service learning: Students teams up and identify a community partner (nursing home, Rehab center, etc.) and conduct a community project
  - Health campaigns
  - Screening programs
  - Free- or Mobile clinic (e.g. in Hajj)
  - Extracurricular activities
  - Endemic areas
  - Multisectoral interdisciplinary systems (e.g. Trauma care, obesity, etc.)

**Lecture Resources & Readings**

- Required Reading:
  - Competencies for interprofessional collaborative practice: 2016 update
    - https://nebula.wsimg.com/2f68a39520b03336b41038c370497473?AccessKeyId=DC06780E69ED19E2B3A5&disposition=0&alloworigin=1
- Required Videos:
  - interprofessional core competencies: https://www.youtube.com/watch?v=0LRZEp-ECVQ
- Optional Videos (HIGHLY RECOMMENDED)
  - Competency 1: Value and ethics (Scenario)
    - https://www.youtube.com/watch?v=L7--0Igd0bQ
  - Competency 2: roles and responsibilities (Scenario)
    - https://www.youtube.com/watch?v=G3add_DXZlA
  - Competency 3: communication (Scenario)
    - https://www.youtube.com/watch?v=p75Qkn-953A
  - Competency 4: Teams and teamwork (Scenario)
    - <https://www.youtube.com/watch?v=IRIkJKppR_8>

**Appendix 3: Knowledge test**

Q1:Effective interprofessional education between health care sectors is believed to improve the

1. Quality of care
2. Patient safety
3. Integrated care
4. All of the above

Q2: The famous report of the expert panel on “Interprofessional Core Competencies for IPE/C” published in 2011 includes which of the following four competency domains:

1. Communication, value-ethics, teamwork, and roles & responsibilities
2. Patient-centred care, patient safety, roles & responsibilities
3. Call-out, call-back, SBAR, Hang-off
4. Multidisciplinary, Patient-centred care, SBAR, and ethics

Q3: Use the knowledge of one’s own role and those of other professions to appropriately assess and address the health care needs of the patients and populations served is the definition of

1. Teamwork
2. Roles/Responsibilities
3. Interprofessional Communication
4. Values/Ethics for Interprofessional Practice

Q4: A 25-year-old- obese lady presented with grade I obesity (BMI 32 kg/m2) and she wants to do sleeve gastrectomy. However, the multidisciplinary treating team decided to give her a chance for dieting and healthier life-style changes. The main essence of interprofessional collaboration in this case:

A. It promotes a traditional physician-centred system of care

B. It focuses on the individual contributions of each healthcare professional

C. It encourages practitioners to specialize and work independently

D. It supports providers to work together to deliver better care
